# Supplementary material for: Sequential glycan profiling at single cell level with the microfluidic lab-in-a-trench platform: a new era in experimental cell biology
Source: Royal Society of Chemistry journal article supplement (doi:10.1039/c4lc00618f), 2014-01-01
Supplement: c4lc00618f7.pdf [file c4lc00618f7.pdf]

## Supplementary Material

### **Calculation of lectin concentration in the trench**

Initial lectin concentration: 2.5 mg/mL = 2.5 µg/µL

Lectin volume used: 0.1 µL

Effective amount: 0.25 µg

Dilution factor for lectin added to trench inlet: 1/20

Effective lectin conc. after dilution: 12.5 ng/µL

Volume of trench: 200X200X100 µm = 4X10<sup>6</sup> µm<sup>3</sup> = .004 µL = 4nL

Effective lectin-holding capacity of trench at saturation: 50 pg

### **Induction of apoptosis**

Induction of apoptosis was carried out by culturing the cells with 1µg/mL anti-IgM (Southern Biotech) for 24 h. Surface IgM (sIgM) cross-linking on such B cells is used as a model system for B Cell Receptor (BCR)-mediated antigen-induced clonal deletion, a natural process which leads to the induction of apoptosis (also known as programmed cell death) (Jiang and Clark 2001, J Immunol 166: 6025-6033).

### **Flow Cytometry**

1×10<sup>5</sup> cells were collected and washed three times with cold PBS. The cells were then resuspended in 250 µL of 10 µg/mL of labelled lectin in TBS with 1mM CaCl<sub>2</sub> and incubated at room temperature for 10 minutes. The cells were washed with HEPES pH 7.4 and re-suspended in 100 µL of cytometry buffer from the Apoptosis Detection Kit. The cells were further labelled with annexin V and 7AAD as per kit instructions. All samples were measured on the BD FACS Aria. All analyses were performed using FlowJo software (Tree Star Inc., 92 Ashland, OR, USA).

Cytometry data was gated to remove debris and doublets. Healthy cells were defined as being annexin V / 7AAD negative, early apoptotic cells were defined as annexin V positive / 7AAD negative, late apoptotic cells and necrotic cells were defined as 7AAD positive and the percentage of lectin-positive cells in each of these subpopulations was determined.

## Supplementary Tables

| Lectin                           | Acronym | Organism                              | Affinity                                                                                   |
|----------------------------------|---------|---------------------------------------|--------------------------------------------------------------------------------------------|
| Concanavalin A                   | ConA    | Canavalia exnsiformis                 | Branched $\alpha$ -mannosidic structures, Core mannose, bianttenary complex type N-glycans |
| Narcissus Psuedonarcissus lectin | NPL     | Narcissus Psuedonarcissus (daffodils) | $\alpha$ -linked mannose, preferring polymannose structures containing (a-1,6) linkages    |
| Lens culinaris agglutinin        | LCA     | Lens culinaris (lentil)               | $\alpha$ -linked fucosylated mannans                                                       |
| Wheat germ agglutinin            | WGA     | Wheat                                 | N-acetyl-D-glucoamine, sialic acid                                                         |
| Erythrina cristagalli lectin     | ECL     | Erythrina cristagalli seeds           | Galactosyl- $\beta$ -1,4-N-acetyl-D-glucosamine                                            |

**Supplementary Table 1:** Lectin specificity information.

| Lectin name | Total Cell Count | Cell count w/o debris / doublets | Healthy cells %age | Healthy Cells Lectin Signal | Early apoptotic cells %age | Early apoptotic cells Lectin Signal | Late apoptotic / necrotic Cells %age | Late apoptotic / necrotic Cells Lectin Signal | Necrotic Cells %age | Necrotic Cells Lectin Signal |
|-------------|------------------|----------------------------------|--------------------|-----------------------------|----------------------------|-------------------------------------|--------------------------------------|-----------------------------------------------|---------------------|------------------------------|
| ConA        | 1.00E4           | 9202                             | 62.9               | 342                         | 7.67                       | 364                                 | 24                                   | 1356                                          | 5.44                | 1030                         |
| ECL         | 6272             | 5517                             | 15.8               | 9192                        | 7.11                       | 6541                                | 59.9                                 | 4878                                          | 17.3                | 5380                         |
| GSL II      | 1.00E4           | 7948                             | 63.3               | 172                         | 5.46                       | 157                                 | 22.1                                 | 159                                           | 9.16                | 699                          |
| LCA         | 6192             | 5078                             | 19.2               | 6850                        | 8.51                       | 6411                                | 52.5                                 | 5523                                          | 19.8                | 7765                         |
| NPL         | 1.00E4           | 9159                             | 66.2               | 317                         | 5.5                        | 273                                 | 21.3                                 | 978                                           | 6.95                | 5626                         |
| SBA         | 7220             | 6130                             | 16.3               | 8625                        | 6.61                       | 7927                                | 60.9                                 | 3509                                          | 16.2                | 2289                         |
| WGA         | 7863             | 6451                             | 13.9               | 1.88E4                      | 9.78                       | 1.76E4                              | 61.5                                 | 1.58E4                                        | 14.8                | 1.95E4                       |

**Supplementary Table 2:** Flow Cytometry. Total cell count is the number of cells counted by the cytometer, where this is less than 10E4 this is due to cell damage during sample preparation. Exclusion of doublets and debris is performed by FSC-A/FSC-H gating. Necrotic cells show 7-AAD staining but not Annexin-V staining. Late apoptotic cells show both 7-AAD and Annexin-V staining. Early apoptotic cells show Annexin-V staining only. Healthy cells have neither Annexin-V nor 7-AAD staining. The lectin signal is the median signal across the quadrant of the V-450 labelled lectin.
