# Supplementary figures and images for: Sequential glycan profiling at single cell level with the microfluidic lab-in-a-trench platform: a new era in experimental cell biology
Source: Royal Society of Chemistry journal article supplement (doi:10.1039/c4lc00618f), 2014-01-01

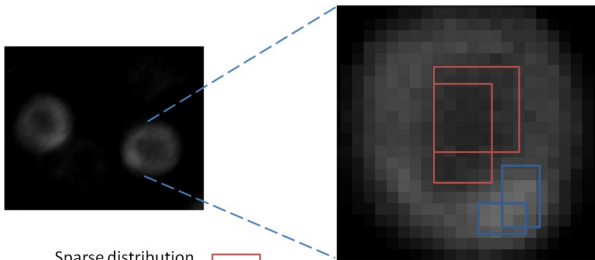

Sparse distribution  
of mannose

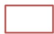

Dense distribution  
of mannose

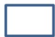

Supplement: c4lc00618f3.pdf [file c4lc00618f3.pdf]

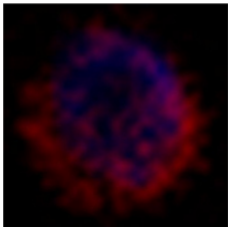

Supplement: c4lc00618f4.pdf [file c4lc00618f4.pdf]

Apoptotic Cells  
NPL probing 0h

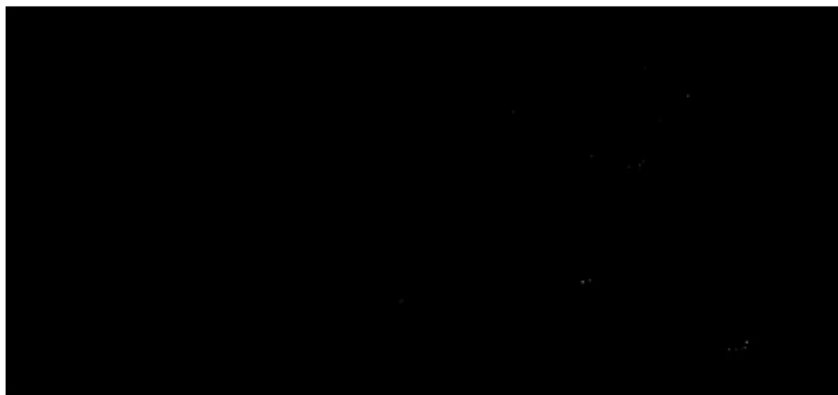

Apoptotic Cells  
NPL probing 24h

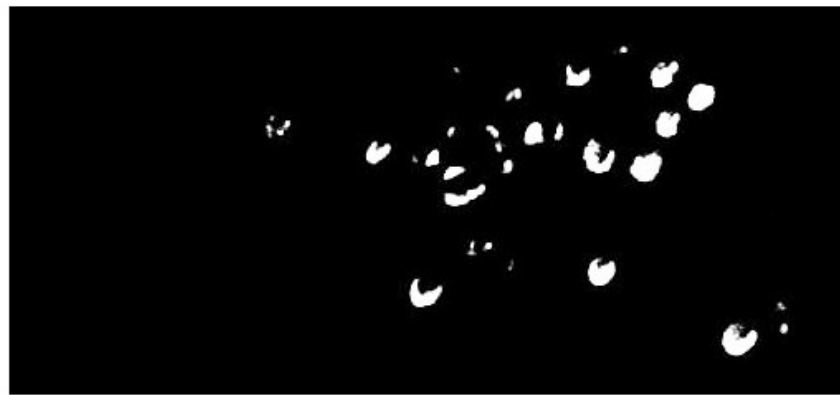

Supplement: c4lc00618f5.pdf [file c4lc00618f5.pdf]

ConA-WGA

ECL-LCA

ECL-ConA

ConA-ECL-LCA-WGA

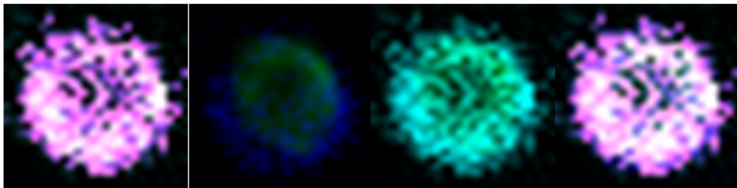

Supplement: c4lc00618f6.pdf [file c4lc00618f6.pdf]
